# Supplementary material for: Redox-reversible niobium-doped strontium titanate decorated with in situ grown nickel nanocatalyst for high-temperature direct steam electrolysis
Source: Royal Society of Chemistry journal article supplement (doi:10.1039/c4dt01430h), 2014-07-30

## SUPPORTING INFORMATION

### **Redox-reversible niobium-doped strontium titanate decorated with *in-situ* grown nickel nanocatalyst for high-temperature direct steam electrolysis**

Liming Yang,<sup>a</sup> Kui Xie,<sup>a,b,\*</sup> Shanshan Xu,<sup>a</sup> Tingshuai Wu,<sup>a</sup> Qi Zhou,<sup>a</sup> Ting Xie,<sup>a</sup> Yucheng Wu<sup>a,b,\*</sup>

<sup>a</sup>Department of Energy Materials, School of Materials Science and Engineering, Hefei University of Technology, No.193 Tunxi Road, Hefei, Anhui 230009, China

<sup>b</sup>Key Laboratory of Advanced Functional Materials and Devices, School of Materials Science and Engineering, Hefei University of Technology, No.193 Tunxi Road, Hefei, Anhui 230009, China

\*Corresponding: xiekui@hfut.edu.cn

#### **Captions**

**Figure S1:** XPS results of Sr (a1) and O (a2) in the oxidized STNNO sample; Sr (b1) and O (b2) in the reduced STNNO samples.

**Figure S2:** Rp of the electrolysis cells with cathodes based on STNO (a) and STNNO (b) in 5% $\text{H}_2\text{O}$ /5% $\text{H}_2$ /Ar (a) and 5% $\text{H}_2\text{O}$ /Ar (b) under different applied potentials at 800 °C.

**Figure S3:** The cross-sectional views of the symmetric cells based on YSZ/STNNO-SDC.

**Figure S4:** The Rp of the symmetric cells with the configuration STNO-SDC /YSZ/STNO-SDC and STNNO-SDC/YSZ/STNNO-SDC tested under different hydrogen partial.

**Figure S5:** The TEM (a), SEM and EDS (b) results of reduced STNNO sample.

Figure S1:

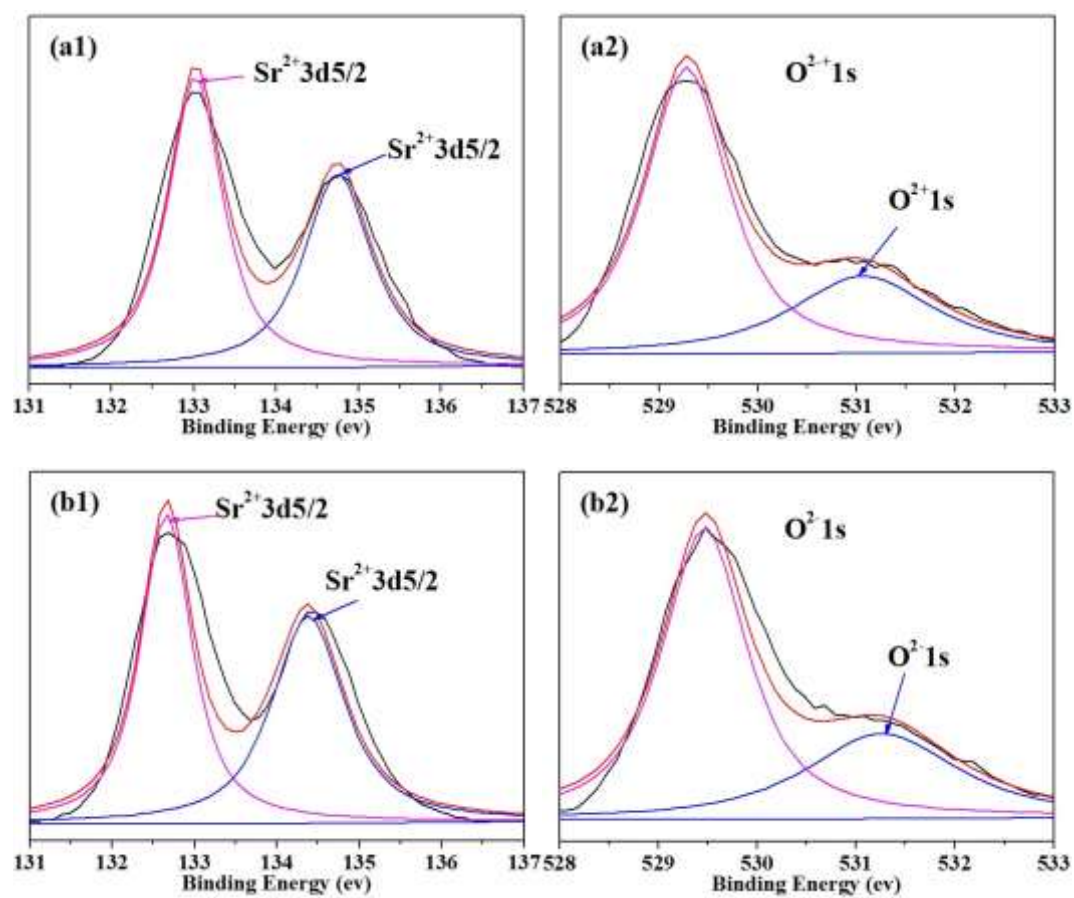

Figure S2:

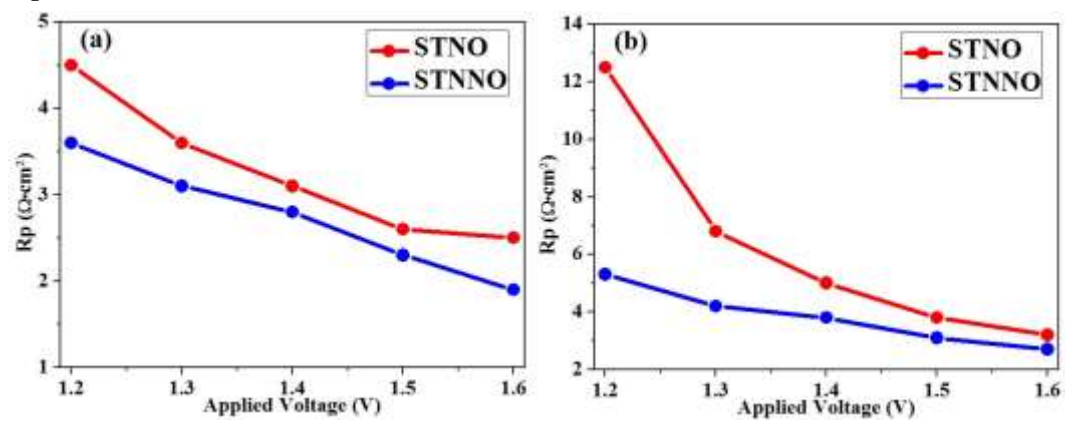

Figure S3:

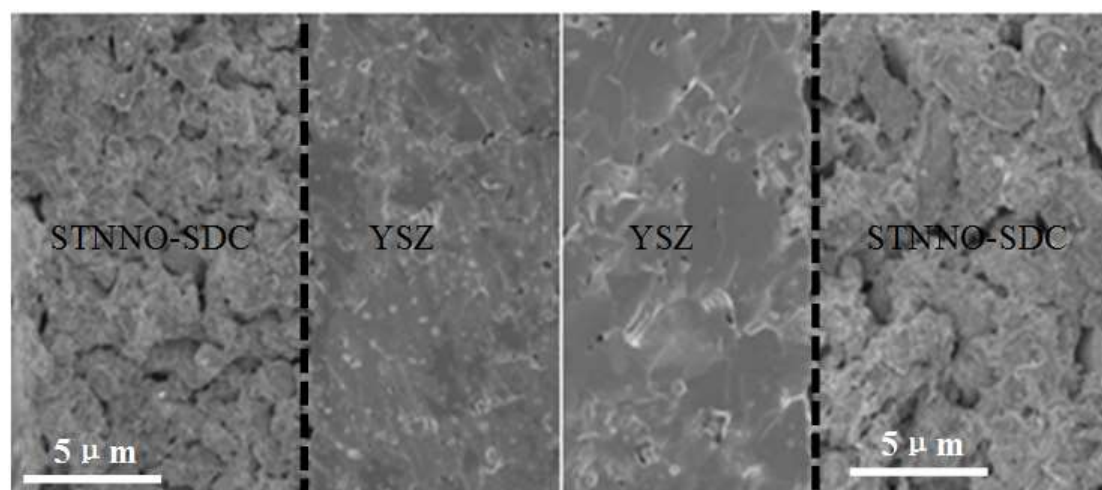

Figure S4:

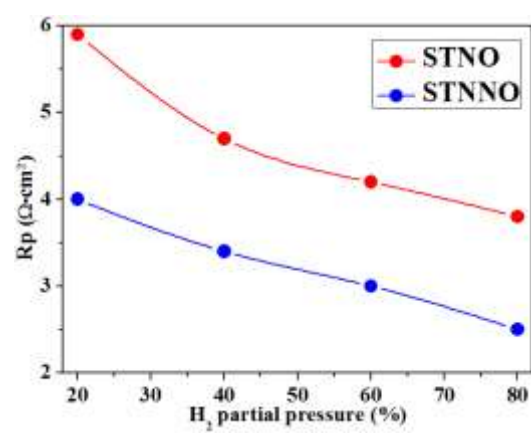

Figure S5:

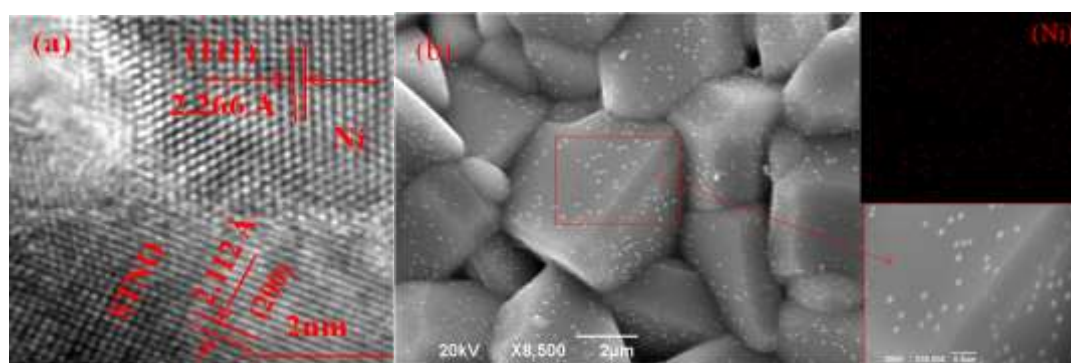

Supplement: c4dt01430h1.pdf [file c4dt01430h1.pdf]
